# Supplementary material for: Regeneration of Transected Recurrent Laryngeal Nerve Using Hybrid-Transplantation of Skeletal Muscle-Derived Stem Cells and Bioabsorbable Scaffold
Source: J Clin Med. 2018 Sep 12;7(9):276. doi: 10.3390/jcm7090276 (PMC6162854; doi:10.3390/jcm7090276)
Supplement: Supplementary file 1 [file jcm-07-00276-s001.zip]

Archive with 5 entries (5 files):
- Point 3.avi
- jcm-350201-SI.pdf
- Point 0.avi
- Point 1.avi
- Point 2.avi
